# Supplementary material for: Saccharide-induced modulation of photoluminescence lifetime in microgels
Source: Royal Society of Chemistry journal article supplement (doi:10.1039/c6cp01523a), 2016-01-01
Supplement: c6cp01523a1.pdf [file c6cp01523a1.pdf]

## Supplementary information

# Saccharide-induced modulation photoluminescence in microgels

Sergey A. Denisov<sup>1</sup>, Florent Pinaud<sup>1</sup>, Maeva Chambaud<sup>1</sup>, Véronique Lapeyre<sup>1</sup>, Bogdan Catargi<sup>2</sup>,  
Neso Sojic<sup>1</sup>, Nathan D. McClenaghan<sup>1</sup>, Valérie Ravaine<sup>1</sup>

<sup>1</sup>Université de Bordeaux, Institut des Sciences Moléculaires, UMR 5255, Bordeaux INP, Site ENSCBP, 16 Avenue Pey Berland, 33607 Pessac Cedex, France

<sup>2</sup>Univ. Bordeaux, CBMN, UMR 5248, F-33600, Pessac, France

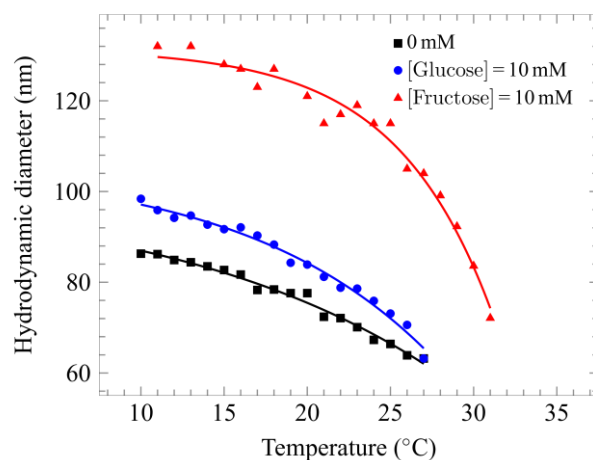

Figure S1: Evolution of the hydrodynamic diameter as a function of temperature in different glucose or fructose concentrations for pNIPAM-PBA-Ru2 microgels. Phosphate buffer 20 mM, pH 8.5. The curves are interrupted at a temperature where the microgels reach a collapsed state. Above this temperature, the microgels are flocculated.

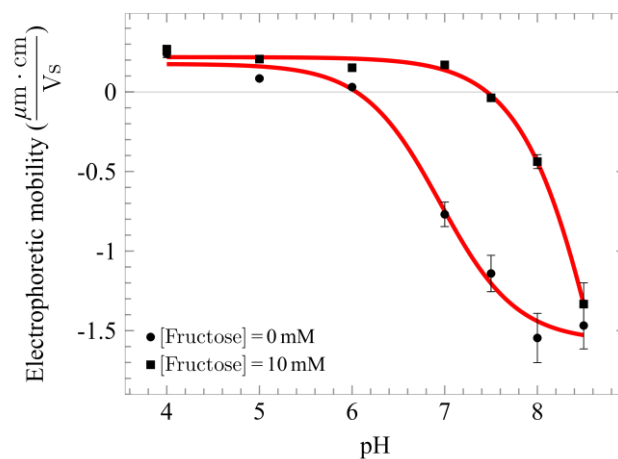

Figure S2. Electrophoretic mobility of the pNIPAM-PBA-Ru1 functionalized microgels as a function of pH,  $T = 25\text{ }^{\circ}\text{C}$ .

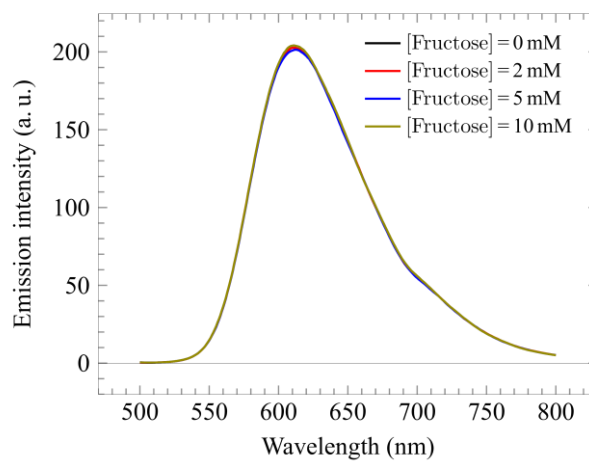

Figure S3. Influence of the presence of fructose on the emission properties of  $[\text{Ru}(\text{bpy})_3]^{2+}$  in solution. Phosphate buffer 20 mM, pH 8.5,  $T = 25^{\circ}\text{C}$ .

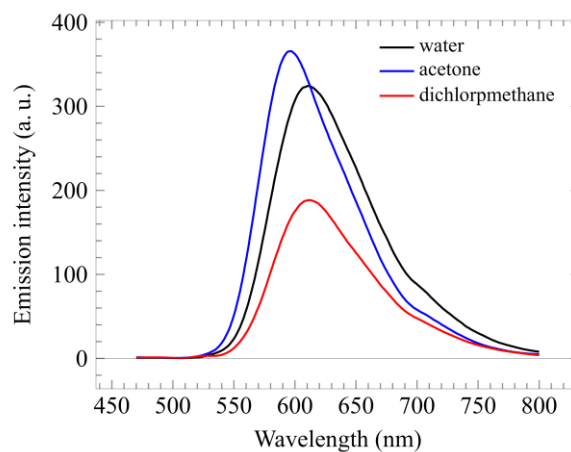

Figure S4. Influence of the solvent polarity on the emission properties of  $[\text{Ru}(\text{bpy})_3]^{2+}$  in solution.  $T = 25^\circ\text{C}$ .

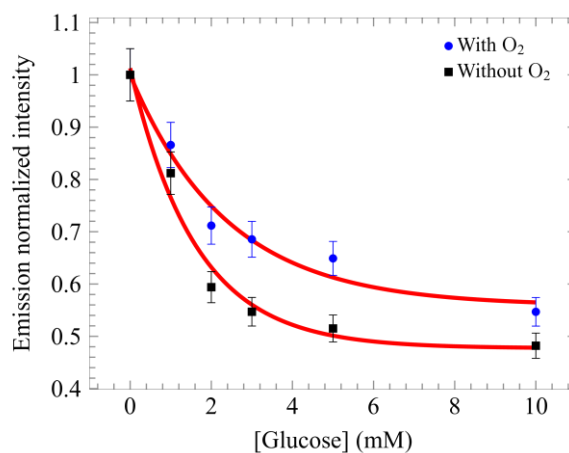

Figure S5. Influence of the presence of oxygen on the emission properties of pNIPAM-PBA-Ru1 as a function of fructose concentration. Phosphate buffer 20 mM, pH 8.5,  $T = 25^\circ\text{C}$ . The concentration of the ruthenium complex is  $10\ \mu\text{M}$ .

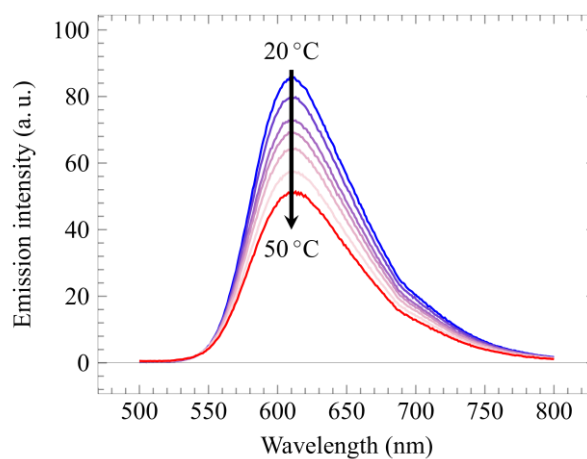

Figure S6. Influence of temperature on the emission properties of pNIPAM-Ru microgel in solution. Phosphate buffer concn. 4 mM, pH 7.4.

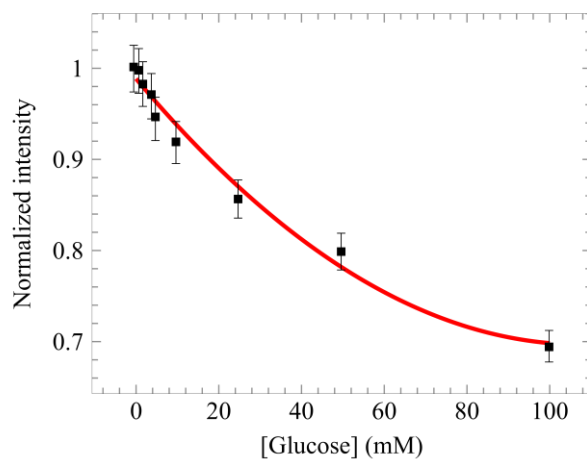

Figure S7. Dependence of pNIPAM-PBA-Ru1 emission intensity on glucose concentration. PL experiments were performed in a 20 mM PBS solution (pH 8.5). The concentration of the ruthenium complex was 10  $\mu$ M.

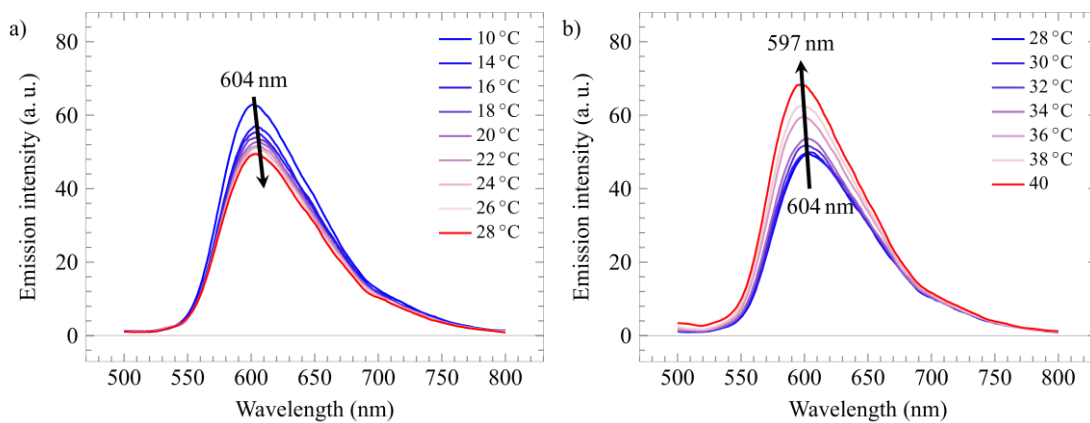

Figure S8: Influence of temperature on the emission properties for pNIPAM-PBA-Ru1 microgels in 5 mM fructose solution. Phosphate buffer concn. 20 mM, pH 8.5.

Table S1. Emission lifetime and quantum yield ( $\Phi_f$ ) of the microgels and  $[\text{Ru}(\text{bpy})_3]^{2+}$  in the presence / absence of fructose at 25 °C.

| Sample                                   | Emission lifetime in air-equilibrated solution (ns) | Emission lifetime in degassed solution (ns) | Emission quantum yield ( $\Phi_f$ ) |
|------------------------------------------|-----------------------------------------------------|---------------------------------------------|-------------------------------------|
| $\text{Ru}(\text{bpy})_3^{2+}$ in buffer | 450± 25 ns                                          | n.a.                                        | 0.04± 0.005                         |
| pNIPAM-Ru in buffer                      | 620 ± 25 ns                                         | 720± 25 ns                                  | 0.063± 0.003                        |
| pNIPAM-Ru in buffer + fructose (10 mM)   | 670± 25 ns                                          | 720± 25 ns                                  | n. a.                               |
| pNIPAM-PBA-Ru1 in buffer                 | 1550 ±50 ns                                         | 1500± 50 ns                                 | 0.175±0.018                         |
| pNIPAM-PBA-Ru1 in buffer + fructose      | 680 ±25 ns                                          | 840± 25 ns                                  | 0.066±0.003                         |
| pNIPAM-PBA-Ru2 in buffer                 | 1080 ±50 ns                                         | n.a.                                        | 0.062±0.003                         |

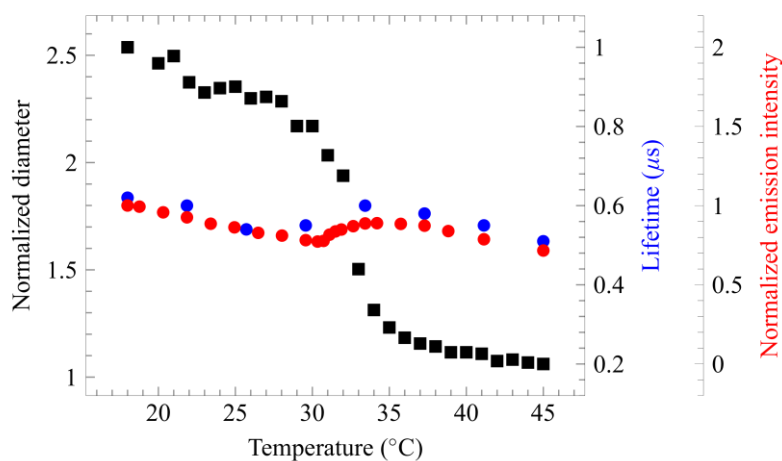

Figure S9. Temperature-dependence of the normalized emission intensity and lifetime of pNIPAM-Ru microgels and their swelling state (normalized hydrodynamic diameter). Phosphate buffer concn. 20 mM, pH 8.5. The concentration of the ruthenium complex is 10  $\mu\text{M}$ .
